# Supplementary material for: Tuning the carrier concentration using Zintl chemistry in Mg3Sb2, and its implications for thermoelectric figure-of-merit
Source: Royal Society of Chemistry journal article supplement (doi:10.1039/c5cp07482g), 2016-01-01
Supplement: c5cp07482g1.pdf [file c5cp07482g1.pdf]

## Tuning the carrier concentration using Zintl chemistry in $\text{Mg}_3\text{Sb}_2$ and, its implications on thermoelectric figure-of-merit

A. Bhardwaj<sup>1,2</sup>, N. S. Chauhan<sup>1,2</sup>, S. Goel<sup>1,2</sup>, Vijeta Singh<sup>1,3</sup>, J. J. Pulikkotil<sup>1,3,4</sup>, T.D. Senguttuvan<sup>1,2</sup>, and D. K. Misra<sup>1,2\*</sup>

<sup>1</sup>Academy of Scientific & Innovative Research (AcSIR), CSIR-National Physical Laboratory (CSIR-NPL) campus, New Delhi-110012, India.

<sup>2</sup>Physics of Energy Harvesting Division, National Physical Laboratory, Council of Scientific and Industrial Research, New Delhi 110012, India.

<sup>3</sup>Quantum Phenomena & Applications Division, National Physical Laboratory, Council of Scientific and Industrial Research, New Delhi 110012, India.

<sup>4</sup>Computational and Networking facility, National Physical Laboratory, Council of Scientific and Industrial Research, New Delhi 110012, India

### Supplementary Information:

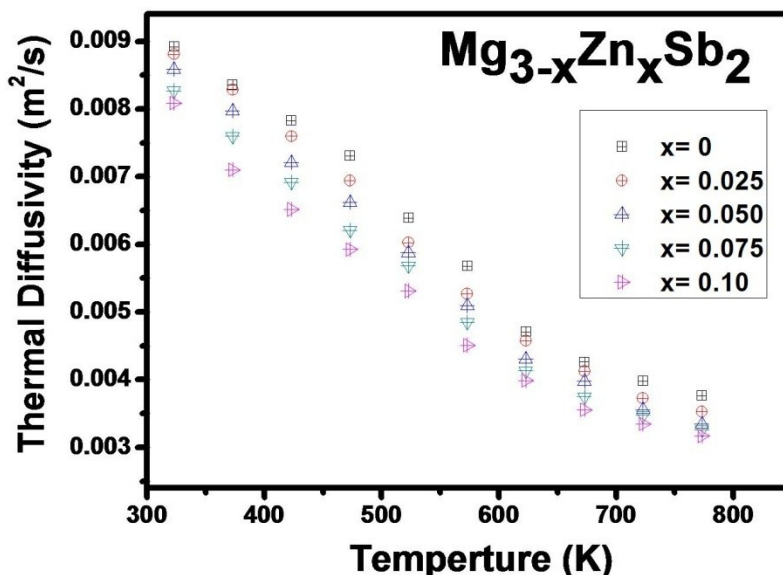

**Figure S1:** Temperature dependence of thermal diffusivity for  $\text{Mg}_{3-x}\text{Zn}_x\text{Sb}_2$  ( $0 \leq x \leq 0.1$ ).

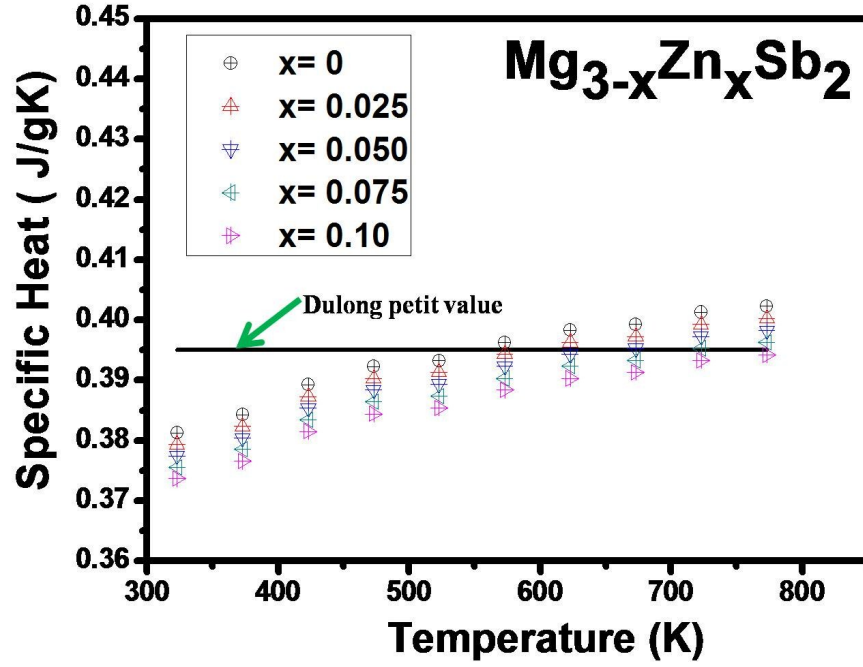

Figure S1: Temperature dependence of specific heat for Mg<sub>3-x</sub>Zn<sub>x</sub>Sb<sub>2</sub> (0 ≤ x ≤ 0.1).

Table T1. Density of Mg<sub>3-x</sub>Zn<sub>x</sub>Sb<sub>2</sub> (0 ≤ x ≤ 0.1) materials

| Compositions                 | Mg <sub>3</sub> Sb <sub>2</sub> | Mg <sub>2.975</sub> Zn <sub>0.025</sub> Sb <sub>2</sub> | Mg <sub>2.95</sub> Zn <sub>0.050</sub> Sb <sub>2</sub> | Mg <sub>2.925</sub> Zn <sub>0.075</sub> Sb <sub>2</sub> | Mg <sub>2.9</sub> Zn <sub>0.10</sub> Sb <sub>2</sub> |
|------------------------------|---------------------------------|---------------------------------------------------------|--------------------------------------------------------|---------------------------------------------------------|------------------------------------------------------|
| Density (g/cm <sup>3</sup> ) | 3.93                            | 3.90                                                    | 3.96                                                   | 3.94                                                    | 3.89                                                 |
